# Supplementary material
Source: MDPI journal article supplement (https://www.mdpi.com/2073-4441/9/11/871)
Supplement: s1 [file s1]

**Table S1.** Parameters and constants used in the calculation of *p*CO2 values (See Equation (3)) in the Red River and Mississippi River near their diversion into the Atchafalaya River from May 2015–2016. K1 and K2 are calculated using the equations of Harned and Davis (1943) and Harned and Scholes (1941) (see methods). Final *p*CO2 calculations were made using Equation (3) (see methods). Missing values are due to YSI probe malfunction.

|  | **Site** | **pH** | **Temperature (°C)** | **k1** | **k2** | ***p*CO2 (µatm)** |
| --- | --- | --- | --- | --- | --- | --- |
| 13 May 2015 | MR | 7.51 | 21.18 | 4.23 × 10−7 | 4.31 × 10−11 | 3595.48 |
|  | RR | 7.07 | 23.77 | 4.38× 10−7 | 4.56 × 10−11 | 3327.61 |
| 22 July 2015 | MR | 7.77 | 28.95 | 4.66× 10−7 | 5.05 × 10−11 | 2334.21 |
|  | RR | 7.74 | 30.79 | 4.75 × 10−7 | 5.22 × 10−11 | 1449.88 |
| 30 August 2015 | MR | 7.86 | 27.79 | 4.61 × 10−7 | 4.95 × 10−11 | 2162.08 |
|  | RR | 7.84 | 28.93 | 4.66 × 10−7 | 5.05 × 10−11 | 1540.12 |
| 20 September 2015 | MR | 7.79 | 26.66 | 4.55 × 10−7 | 4.84 × 10−11 | 2821.14 |
|  | RR | 8.17 | 28.91 | 4.66 × 10−7 | 5.05 × 10−11 | 894.11 |
| 29 October 2015 | MR | 7.53 | 19.78 | 4.14 × 10−7 | 4.18 × 10−11 | 3403.31 |
|  | RR | 7.61 | 21.69 | 4.26 × 10−7 | 4.36 × 10−11 | 1520.72 |
| 22 November 2015 | MR | 7.44 | 15.33 | 3.83 × 10−7 | 3.75 × 10−11 | 3651.40 |
|  | RR | 7.68 | 16.71 | 3.93 × 10−7 | 3.88 × 10−11 | 871.15 |
| 9 December 2015 | MR | 7.60 | 10.47 | 3.47 × 10−7 | 3.29 × 10−11 | 2271.98 |
|  | RR | 8.33 | 11.86 | 3.57 × 10−7 | 3.42 × 10−11 | 227.24 |
| 28 February2016 | MR | 8.05 | 8.68 | 3.33 × 10−7 | 3.13 × 10−11 | 729.68 |
| 17 April 2016 | RR | 7.37 | 19.53 | 4.12 × 10−7 | 4.15 × 10−11 | 1807.63 |
| 19 May 2016 | MR | 7.76 | 20.20 | 4.16 × 10−7 | 4.22 × 10−11 | 1984.97 |
|  | RR | 7.37 | 22.91 | 4.33 × 10−7 | 4.48 × 10−11 | 2290.10 |
